# Supplementary material for: Shift-field refinement of macromolecular atomic models
Source: PubMed Central journal article supplement (PMC7709196; doi:10.1107/s2059798320013170), 2020-11-19
Supplement: d-76-01192-sup1.pdf [file d-76-01192-sup1.pdf]

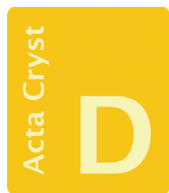

STRUCTURAL  
BIOLOGY

**Volume 76 (2020)**

**Supporting information for article:**

**Shift-field refinement of macromolecular atomic models**

**K. Cowtan, S. Metcalfe and P. Bond**

| Target structure | Target resolution | Search structure | Sequence identity | GESAMT RMSD | PHASER LLG | Initial R-free | Refined R-free | Phase error |      |      |
|------------------|-------------------|------------------|-------------------|-------------|------------|----------------|----------------|-------------|------|------|
|                  |                   |                  |                   |             |            |                |                | CR          | JB   | SF   |
| 5ZRQ             | 1.12              | 1JFR             | 0.684             | 0.541       | 4023.0     | 0.462          | 0.356          | 28.4        | 28.0 | 28.3 |
| 1UKU             | 1.45              | 1VHF             | 0.470             | 0.580       | 569.9      | 0.496          | 0.403          | 32.5        | 32.0 | 32.2 |
| 4F2E             | 1.45              | 4F2F             | 0.389             | 0.616       | 519.8      | 0.510          | 0.430          | 38.7        | 38.8 | 38.7 |
| 3U04             | 1.70              | 4AZ4             | 0.415             | 0.696       | 842.0      | 0.479          | 0.395          | 38.5        | 38.4 | 37.3 |
| 3ZVD             | 2.25              | 1L1N             | 0.663             | 0.702       | 1171.8     | 0.452          | 0.372          | 33.0        | 32.4 | 32.8 |
| 4YFO             | 3.35              | 3DU1             | 0.556             | 0.730       | 892.4      | 0.482          | 0.441          | 71.0        | 71.2 | 70.8 |
| 5WGI             | 1.05              | 5G0G             | 0.469             | 0.745       | 2145.1     | 0.483          | 0.329          | 27.8        | 27.5 | 27.3 |
| 4MU3             | 1.12              | 6FWH             | 0.459             | 0.750       | 894.3      | 0.518          | 0.393          | 32.2        | 31.1 | 31.4 |
| 5HZH             | 2.60              | 5C2K             | 0.586             | 0.788       | 364.5      | 0.466          | 0.449          | 54.6        | 54.6 | 54.5 |
| 5JEY             | 2.80              | 1LQW             | 0.506             | 0.789       | 588.3      | 0.432          | 0.409          | 45.4        | 45.2 | 44.8 |
| 5WVG             | 1.15              | 5O3F             | 0.430             | 0.806       | 575.1      | 0.517          | 0.436          | 38.2        | 37.9 | 38.5 |
| 4Z7R             | 1.54              | 1I00             | 0.494             | 0.811       | 696.7      | 0.532          | 0.414          | 34.0        | 31.9 | 32.8 |
| 5H9R             | 1.58              | 5DUV             | 0.368             | 0.841       | 755.5      | 0.517          | 0.419          | 34.3        | 30.3 | 34.1 |
| 5KWN             | 1.42              | 5IGQ             | 0.538             | 0.851       | 556.7      | 0.547          | 0.463          | 30.2        | 29.4 | 29.8 |
| 6GKA             | 1.76              | 1SQ3             | 0.224             | 0.867       | 385.7      | 0.492          | 0.416          | 41.9        | 42.1 | 42.1 |
| 1G9K             | 1.97              | 3V1I             | 0.667             | 0.868       | 1672.0     | 0.423          | 0.350          | 32.3        | 32.1 | 31.7 |
| 5M6F             | 2.39              | 1Q4Q             | 0.435             | 0.877       | 552.8      | 0.464          | 0.434          | 44.7        | 43.5 | 44.0 |
| 5ZYS             | 1.78              | 3RL7             | 0.378             | 0.885       | 169.4      | 0.510          | 0.466          | 43.8        | 43.8 | 43.2 |
| 6FM6             | 1.05              | 4X68             | 0.561             | 0.885       | 2208.6     | 0.495          | 0.363          | 31.3        | 29.7 | 29.2 |
| 2NUK             | 1.20              | 1RIE             | 0.472             | 0.894       | 150.4      | 0.527          | 0.454          | 46.7        | 44.0 | 46.1 |
| 5167             | 2.60              | 2ZCI             | 0.646             | 0.899       | 1545.8     | 0.439          | 0.383          | 32.2        | 30.3 | 30.7 |
| 6BCE             | 1.75              | 5ESP             | 0.467             | 0.902       | 711.3      | 0.508          | 0.453          | 47.2        | 45.3 | 45.9 |
| 352N             | 1.40              | 1ITQ             | 0.464             | 0.907       | 1849.1     | 0.512          | 0.398          | 36.8        | 36.4 | 36.7 |
| 4B29             | 1.72              | 5JSO             | 0.441             | 0.917       | 1426.4     | 0.475          | 0.356          | 33.6        | 33.2 | 33.2 |
| 3PKB             | 1.25              | 4U6W             | 0.500             | 0.937       | 1397.8     | 0.493          | 0.368          | 32.9        | 32.3 | 32.6 |
| 3MOK             | 1.55              | 3DDR             | 0.516             | 0.945       | 201.4      | 0.535          | 0.432          | 37.9        | 37.5 | 37.2 |
| 5JEI             | 1.23              | 5IKB             | 0.570             | 0.947       | 757.2      | 0.512          | 0.390          | 29.9        | 29.0 | 29.9 |
| 4P01             | 3.40              | 1XMS             | 0.628             | 0.954       | 951.7      | 0.365          | 0.299          | 32.0        | 32.2 | 31.7 |
| 5J4K             | 1.35              | 2Z43             | 0.581             | 0.955       | 1006.3     | 0.476          | 0.378          | 31.0        | 29.2 | 30.1 |
| 1FY5             | 2.00              | 3WR2             | 0.419             | 0.956       | 243.7      | 0.499          | 0.464          | 44.5        | 43.5 | 43.5 |
| 5XG4             | 3.00              | 1RTF             | 0.463             | 0.963       | 360.8      | 0.412          | 0.366          | 43.4        | 43.5 | 42.9 |
| 5KTO             | 1.44              | 5LQS             | 0.537             | 0.966       | 718.0      | 0.500          | 0.411          | 37.5        | 36.8 | 37.4 |
| 5JVE             | 1.10              | 2J9B             | 0.472             | 0.967       | 310.6      | 0.548          | 0.438          | 35.8        | 33.0 | 33.9 |
| 1EYB             | 1.90              | 4AQ2             | 0.514             | 0.973       | 1573.9     | 0.482          | 0.370          | 34.2        | 33.4 | 33.8 |
| 5CGY             | 1.18              | 3BE4             | 0.500             | 0.975       | 394.8      | 0.522          | 0.448          | 37.9        | 35.0 | 36.0 |
| 3K4J             | 2.00              | 4MIF             | 0.482             | 0.985       | 1672.4     | 0.454          | 0.392          | 39.0        | 37.8 | 38.4 |
| 4BAT             | 1.30              | 3QYJ             | 0.461             | 0.995       | 1378.3     | 0.499          | 0.357          | 28.4        | 27.9 | 28.0 |
| 5DUT             | 1.50              | 3UYW             | 0.458             | 1.006       | 862.2      | 0.494          | 0.365          | 36.8        | 36.3 | 36.5 |
| 6FF1             | 1.30              | 3H9Z             | 0.250             | 1.010       | 143.9      | 0.518          | 0.464          | 40.0        | 38.6 | 38.6 |
| 6O5W             | 1.41              | 5YVX             | 0.405             | 1.029       | 215.0      | 0.531          | 0.479          | 46.7        | 46.3 | 46.1 |
| 4B6P             | 2.30              | 6CV6             | 0.415             | 1.030       | 344.8      | 0.456          | 0.384          | 32.6        | 33.0 | 32.6 |
| 5K5M             | 2.01              | 4MTP             | 0.670             | 1.033       | 2528.5     | 0.465          | 0.368          | 32.4        | 32.0 | 31.8 |
| 5EMI             | 1.12              | 1JWQ             | 0.413             | 1.043       | 471.5      | 0.521          | 0.422          | 33.1        | 32.4 | 32.6 |
| 3S4E             | 1.26              | 2NT2             | 0.350             | 1.045       | 123.0      | 0.541          | 0.502          | 40.9        | 33.5 | 37.9 |
| 6D9A             | 2.90              | 3GF4             | 0.443             | 1.048       | 559.5      | 0.490          | 0.455          | 43.7        | 37.8 | 38.9 |
| 4N6K             | 1.20              | 4PFB             | 0.412             | 1.049       | 250.8      | 0.519          | 0.468          | 37.9        | 35.6 | 35.7 |
| 2BBE             | 1.97              | 4Z0S             | 0.156             | 1.050       | 296.5      | 0.542          | 0.446          | 43.5        | 43.3 | 44.2 |
| 3C1I             | 1.81              | 3KE5             | 0.472             | 1.061       | 468.2      | 0.467          | 0.400          | 39.7        | 39.2 | 39.6 |
| 3PFC             | 1.75              | 2WTN             | 0.314             | 1.063       | 358.8      | 0.513          | 0.437          | 37.5        | 35.2 | 37.0 |
| 4WZU             | 1.88              | 4NHD             | 0.404             | 1.065       | 740.6      | 0.490          | 0.421          | 37.8        | 36.4 | 37.4 |
| 3U55             | 1.38              | 6HIP             | 0.402             | 1.068       | 389.2      | 0.499          | 0.427          | 41.5        | 42.3 | 40.9 |
| 4YVO             | 1.45              | 3KD7             | 0.240             | 1.075       | 193.6      | 0.556          | 0.450          | 40.8        | 40.4 | 40.5 |
| 4ZBG             | 1.25              | 4RS2             | 0.393             | 1.084       | 227.4      | 0.532          | 0.465          | 41.6        | 36.9 | 38.7 |
| 1XCS             | 1.95              | 1R2Y             | 0.423             | 1.096       | 532.1      | 0.520          | 0.465          | 42.9        | 41.1 | 41.8 |
| 3A9B             | 1.20              | 1BVW             | 0.452             | 1.100       | 534.5      | 0.517          | 0.422          | 40.7        | 37.1 | 41.1 |
| 2NSM             | 1.92              | 3MNS             | 0.435             | 1.120       | 1522.4     | 0.485          | 0.392          | 37.0        | 35.7 | 35.9 |
| 6GQ4             | 1.65              | 3OE3             | 0.182             | 1.123       | 98.2       | 0.543          | 0.512          | 60.1        | 59.2 | 60.1 |
| 4IQW             | 2.60              | 4YCX             | 0.466             | 1.130       | 458.8      | 0.503          | 0.467          | 47.4        | 40.2 | 42.1 |
| 4YKC             | 2.70              | 6FDD             | 0.233             | 1.131       | 130.7      | 0.513          | 0.470          | 50.6        | 49.1 | 50.5 |
| 5ILS             | 1.40              | 5ESG             | 0.549             | 1.151       | 191.2      | 0.529          | 0.466          | 39.0        | 36.9 | 36.0 |
| 6ESC             | 2.70              | 2GUM             | 0.575             | 1.151       | 1200.1     | 0.447          | 0.389          | 35.1        | 30.6 | 34.8 |
| 5VH1             | 2.30              | 2V2U             | 0.509             | 1.157       | 156.7      | 0.518          | 0.487          | 52.6        | 40.7 | 44.9 |
| 6MGB             | 1.60              | 6MGC             | 0.453             | 1.159       | 711.5      | 0.483          | 0.415          | 37.9        | 37.4 | 37.2 |
| 2R7K             | 2.10              | 2R87             | 0.506             | 1.163       | 556.0      | 0.527          | 0.458          | 38.4        | 37.1 | 37.0 |
| 4NVB             | 1.17              | 5AMM             | 0.406             | 1.165       | 645.5      | 0.532          | 0.439          | 38.5        | 37.2 | 37.8 |
| 5EUS             | 1.83              | 5EZB             | 0.588             | 1.167       | 224.7      | 0.530          | 0.481          | 32.1        | 31.6 | 31.7 |
| 2D1R             | 1.60              | 4G36             | 0.679             | 1.168       | 1520.3     | 0.511          | 0.424          | 34.8        | 28.6 | 29.4 |
| 4HDT             | 1.60              | 3BPT             | 0.377             | 1.172       | 337.3      | 0.493          | 0.439          | 39.0        | 38.0 | 39.1 |
| 5A9A             | 1.82              | 5A8S             | 0.361             | 1.174       | 171.8      | 0.531          | 0.519          | 51.1        | 43.0 | 46.4 |
| 5I2Q             | 1.94              | 1AVS             | 0.295             | 1.180       | 95.5       | 0.548          | 0.510          | 54.9        | 52.2 | 53.1 |
| 4XQM             | 1.63              | 3AIH             | 0.235             | 1.182       | 201.4      | 0.524          | 0.501          | 50.6        | 50.0 | 49.8 |
| 4TYJ             | 2.45              | 3D7U             | 0.418             | 1.189       | 421.7      | 0.505          | 0.454          | 40.8        | 38.0 | 39.2 |
| 5MDU             | 1.02              | 5O1Y             | 0.468             | 1.206       | 491.4      | 0.508          | 0.415          | 43.3        | 40.5 | 30.5 |
| 4W8B             | 1.15              | 5OYC             | 0.400             | 1.209       | 479.4      | 0.517          | 0.434          | 43.7        | 41.6 | 43.0 |
| 4J7T             | 3.20              | 2Q7M             | 0.363             | 1.213       | 288.6      | 0.453          | 0.415          | 40.8        | 40.3 | 40.6 |
| 5NOA             | 1.26              | 4CE7             | 0.328             | 1.214       | 215.1      | 0.530          | 0.490          | 43.9        | 37.1 | 38.2 |
| 5BVR             | 1.46              | 1WKU             | 0.502             | 1.215       | 247.3      | 0.522          | 0.466          | 34.3        | 31.8 | 32.5 |
| 2BHZ             | 1.20              | 3VGG             | 0.369             | 1.221       | 651.8      | 0.530          | 0.462          | 43.7        | 40.1 | 40.6 |
| 5C1C             | 1.80              | 1XG2             | 0.341             | 1.228       | 908.7      | 0.476          | 0.426          | 43.0        | 42.6 | 42.7 |
| 3ESS             | 1.19              | 1XK9             | 0.435             | 1.229       | 353.9      | 0.539          | 0.469          | 43.8        | 42.1 | 41.8 |
| 2CG3             | 2.60              | 4AXH             | 0.451             | 1.242       | 957.2      | 0.496          | 0.477          | 36.8        | 32.5 | 33.9 |
| 4WPG             | 1.10              | 1VL0             | 0.410             | 1.242       | 351.0      | 0.510          | 0.436          | 40.9        | 37.5 | 36.7 |
| 4XHV             | 1.23              | 4UU6             | 0.217             | 1.244       | 63.6       | 0.560          | 0.543          | 59.6        | 58.0 | 58.7 |
| 3FD3             | 1.70              | 3ISP             | 0.424             | 1.265       | 284.8      | 0.534          | 0.468          | 40.4        | 39.8 | 37.0 |
| 4LQT             | 1.10              | 3VIC             | 0.233             | 1.266       | 144.8      | 0.532          | 0.535          | 84.0        | 79.8 | 40.3 |
| 2H30             | 1.60              | 4HQS             | 0.295             | 1.267       | 162.3      | 0.545          | 0.455          | 38.6        | 37.2 | 38.0 |
| 3ESX             | 2.09              | 3DQP             | 0.352             | 1.270       | 541.6      | 0.500          | 0.428          | 39.0        | 37.6 | 37.1 |
| 5OIZ             | 3.40              | 5MDU             | 0.468             | 1.281       | 239.7      | 0.434          | 0.422          | 42.7        | 40.2 | 39.6 |
| 4CST             | 1.10              | 5LNG             | 0.430             | 1.283       | 188.2      | 0.540          | 0.490          | 37.0        | 33.8 | 34.8 |

| Target structure | Target resolution | Search structure | Sequence identity | GESAMT RMSD | PHASER LLG | Initial R-free | Refined R-free | Phase error |      |      |
|------------------|-------------------|------------------|-------------------|-------------|------------|----------------|----------------|-------------|------|------|
|                  |                   |                  |                   |             |            |                |                | CR          | JB   | SF   |
| 519J             | 1.74              | 3POL             | 0.369             | 1.296       | 213.5      | 0.544          | 0.529          | 74.9        | 73.9 | 62.2 |
| 6EVG             | 1.10              | 2YXW             | 0.412             | 1.299       | 446.6      | 0.517          | 0.443          | 39.9        | 31.2 | 40.3 |
| 4NOK             | 2.50              | 5HOI             | 0.425             | 1.301       | 615.3      | 0.500          | 0.480          | 44.5        | 43.8 | 43.4 |
| 3SAU             | 1.65              | 4PDG             | 0.414             | 1.304       | 114.1      | 0.548          | 0.529          | 42.4        | 33.5 | 39.4 |
| 5ZLH             | 1.75              | 1P9P             | 0.435             | 1.305       | 139.5      | 0.525          | 0.516          | 47.2        | 35.1 | 35.4 |
| 5CLA             | 1.54              | 2B6C             | 0.365             | 1.307       | 136.2      | 0.524          | 0.491          | 53.5        | 50.4 | 50.9 |
| 5ACK             | 1.24              | 4COT             | 0.513             | 1.309       | 355.0      | 0.523          | 0.427          | 37.2        | 33.8 | 36.2 |
| 5UU2             | 1.22              | 2WFU             | 0.304             | 1.310       | 247.5      | 0.514          | 0.483          | 53.3        | 53.1 | 53.1 |
| 4D74             | 1.57              | 1LJU             | 0.250             | 1.319       | 82.3       | 0.548          | 0.496          | 51.0        | 50.5 | 50.2 |
| 3Q71             | 2.20              | 5LAU             | 0.215             | 1.327       | 155.6      | 0.532          | 0.498          | 48.4        | 45.7 | 45.3 |
| 5EXJ             | 1.62              | 4U0O             | 0.469             | 1.329       | 216.2      | 0.541          | 0.530          | 52.7        | 46.3 | 47.1 |
| 5K1Q             | 1.55              | 3GKA             | 0.426             | 1.329       | 733.5      | 0.484          | 0.416          | 40.5        | 37.7 | 38.8 |
| 3OJG             | 1.60              | 4KF1             | 0.350             | 1.335       | 273.6      | 0.538          | 0.496          | 46.9        | 44.4 | 44.7 |
| 6DN4             | 1.99              | 1L9Y             | 0.336             | 1.335       | 165.9      | 0.544          | 0.498          | 49.0        | 40.7 | 42.4 |
| 6INC             | 1.60              | 1XV2             | 0.326             | 1.338       | 168.5      | 0.543          | 0.503          | 43.0        | 40.9 | 41.3 |
| 3FF2             | 1.90              | 4KVH             | 0.170             | 1.347       | 76.4       | 0.556          | 0.552          | 60.9        | 57.6 | 57.6 |
| 6KBX             | 1.22              | 2BDV             | 0.369             | 1.355       | 137.3      | 0.513          | 0.510          | 52.1        | 49.4 | 49.1 |
| 4ZRG             | 2.70              | 1G4M             | 0.585             | 1.356       | 280.9      | 0.529          | 0.492          | 50.0        | 40.6 | 41.0 |
| 5WOF             | 1.60              | 5FFV             | 0.274             | 1.358       | 44.0       | 0.535          | 0.482          | 51.8        | 51.5 | 50.3 |
| 2YLZ             | 2.00              | 3UOZ             | 0.428             | 1.361       | 556.5      | 0.523          | 0.504          | 56.4        | 35.4 | 41.9 |
| 2XVZ             | 2.40              | 2XWP             | 0.361             | 1.366       | 296.2      | 0.496          | 0.462          | 44.3        | 39.4 | 39.1 |
| 3WH2             | 1.30              | 6A7T             | 0.294             | 1.378       | 117.7      | 0.523          | 0.466          | 52.4        | 52.0 | 48.6 |
| 4MZB             | 1.04              | 2HZF             | 0.283             | 1.378       | 53.5       | 0.575          | 0.579          | 53.6        | 45.5 | 34.5 |
| 5H8T             | 1.21              | 1LIC             | 0.364             | 1.378       | 67.5       | 0.538          | 0.534          | 61.8        | 42.2 | 44.1 |
| 3PLB             | 1.18              | 1GVZ             | 0.354             | 1.384       | 91.7       | 0.548          | 0.526          | 54.8        | 46.5 | 52.9 |
| 3HS4             | 1.09              | 4TWM             | 0.309             | 1.393       | 172.8      | 0.544          | 0.482          | 51.7        | 48.4 | 46.0 |
| 5BOW             | 1.31              | 3F62             | 0.144             | 1.397       | 123.8      | 0.566          | 0.531          | 53.2        | 50.3 | 50.6 |
| 6OF1             | 3.00              | 2I6L             | 0.477             | 1.397       | 192.1      | 0.535          | 0.528          | 59.5        | 54.4 | 55.5 |
| 4NBR             | 1.35              | 4BO2             | 0.353             | 1.418       | 176.4      | 0.539          | 0.489          | 50.6        | 48.1 | 48.9 |
| 4BDK             | 3.30              | 3ZXT             | 0.371             | 1.419       | 210.1      | 0.471          | 0.445          | 48.3        | 45.1 | 44.8 |
| 3TG2             | 1.10              | 3HB7             | 0.223             | 1.429       | 180.7      | 0.559          | 0.489          | 42.1        | 39.4 | 42.2 |
| 3H3E             | 2.75              | 2P4Z             | 0.344             | 1.430       | 255.5      | 0.492          | 0.444          | 49.4        | 47.7 | 47.7 |
| 4FJN             | 2.00              | 1KK8             | 0.379             | 1.430       | 572.3      | 0.510          | 0.477          | 48.7        | 43.8 | 43.8 |
| 5UL6             | 1.45              | 2OAW             | 0.333             | 1.430       | 35.0       | 0.530          | 0.538          | 73.5        | 60.5 | 67.1 |
| 5YFX             | 2.70              | 2YRF             | 0.329             | 1.434       | 235.7      | 0.538          | 0.501          | 47.8        | 45.8 | 45.9 |
| 2HYK             | 1.30              | 5DXD             | 0.378             | 1.441       | 131.3      | 0.523          | 0.510          | 62.0        | 55.8 | 52.2 |
| 4AV8             | 3.35              | 5LTD             | 0.235             | 1.443       | 261.2      | 0.527          | 0.467          | 45.0        | 42.2 | 42.1 |
| 4N9S             | 1.06              | 4R8X             | 0.271             | 1.446       | 128.3      | 0.545          | 0.533          | 48.8        | 38.5 | 38.4 |
| 4MXD             | 1.45              | 2XMZ             | 0.289             | 1.447       | 116.2      | 0.548          | 0.520          | 48.3        | 40.2 | 47.6 |
| 6NYW             | 2.19              | 6B5D             | 0.426             | 1.449       | 242.0      | 0.509          | 0.456          | 43.2        | 37.0 | 38.4 |
| 6E1A             | 3.09              | 3RE2             | 0.539             | 1.452       | 594.3      | 0.480          | 0.446          | 42.2        | 39.8 | 38.9 |
| 5JNT             | 1.36              | 1LJL             | 0.220             | 1.453       | 72.5       | 0.537          | 0.520          | 56.4        | 51.6 | 51.5 |
| 5VIX             | 1.55              | 5V3T             | 0.221             | 1.458       | 22.4       | 0.567          | 0.560          | 84.4        | 84.4 | 82.0 |
| 4EX9             | 3.15              | 4GJ1             | 0.439             | 1.460       | 410.1      | 0.464          | 0.398          | 34.9        | 33.2 | 34.4 |
| 5ZUN             | 1.35              | 6EIC             | 0.350             | 1.466       | 191.6      | 0.543          | 0.494          | 45.2        | 39.9 | 40.1 |
| 4XSG             | 3.29              | 5HP5             | 0.589             | 1.468       | 556.8      | 0.455          | 0.398          | 37.7        | 32.8 | 33.5 |
| 3CLM             | 1.14              | 4E0C             | 0.244             | 1.469       | 88.5       | 0.534          | 0.510          | 57.8        | 52.2 | 53.9 |
| 4MYQ             | 1.90              | 3QPO             | 0.256             | 1.469       | 157.0      | 0.508          | 0.486          | 49.4        | 46.6 | 46.6 |
| 4OU4             | 2.40              | 1JJI             | 0.316             | 1.470       | 238.1      | 0.527          | 0.484          | 51.0        | 47.8 | 45.4 |
| 6A9V             | 2.90              | 3IG4             | 0.271             | 1.470       | 270.5      | 0.504          | 0.469          | 46.1        | 40.7 | 42.3 |
| 5LW3             | 1.19              | 3ZFP             | 0.218             | 1.476       | 295.0      | 0.549          | 0.534          | 81.7        | 78.0 | 55.9 |
| 3V2B             | 2.20              | 2DX6             | 0.276             | 1.477       | 55.3       | 0.564          | 0.543          | 63.1        | 60.4 | 52.1 |
| 5KPY             | 2.40              | 4NB4             | 0.239             | 1.477       | 167.4      | 0.536          | 0.501          | 51.2        | 49.7 | 49.8 |
| 1HV7             | 1.70              | 1GVZ             | 0.335             | 1.478       | 98.8       | 0.542          | 0.529          | 65.8        | 62.8 | 56.3 |
| 1X55             | 1.80              | 1WYD             | 0.355             | 1.480       | 287.2      | 0.540          | 0.517          | 52.0        | 41.5 | 48.2 |
| 5D9L             | 2.15              | 3A62             | 0.548             | 1.480       | 165.3      | 0.486          | 0.456          | 52.7        | 47.1 | 47.0 |
| 5DXX             | 1.45              | 3KRZ             | 0.292             | 1.480       | 140.9      | 0.537          | 0.520          | 53.7        | 49.1 | 49.8 |
| 4JED             | 1.10              | 3MOF             | 0.233             | 1.481       | 70.8       | 0.567          | 0.566          | 76.3        | 59.4 | 49.0 |
| 5ARB             | 1.15              | 4M1Z             | 0.323             | 1.481       | 180.4      | 0.539          | 0.489          | 49.2        | 45.2 | 39.2 |
| 2X5Y             | 1.01              | 5NGO             | 0.136             | 1.482       | 93.8       | 0.550          | 0.511          | 58.0        | 54.7 | 51.9 |
| 3LA9             | 2.05              | 3NTN             | 0.427             | 1.486       | 98.8       | 0.542          | 0.554          | 74.7        | 72.8 | 72.6 |
| 6CN3             | 3.35              | 3X08             | 0.330             | 1.486       | 380.3      | 0.484          | 0.445          | 38.8        | 35.3 | 36.1 |
| 6FZG             | 1.79              | 3IPQ             | 0.269             | 1.486       | 130.0      | 0.530          | 0.491          | 48.3        | 45.8 | 47.6 |
| 3PL3             | 1.18              | 5W0A             | 0.474             | 1.493       | 505.6      | 0.528          | 0.455          | 41.7        | 40.4 | 41.4 |
| 5IR2             | 2.08              | 5X15             | 0.204             | 1.496       | 180.2      | 0.535          | 0.515          | 47.9        | 46.6 | 45.2 |
| 5ZNC             | 1.66              | 3UAZ             | 0.239             | 1.496       | 147.2      | 0.534          | 0.506          | 48.8        | 46.8 | 47.2 |
| 5IT6             | 1.55              | 4LBQ             | 0.238             | 1.500       | 195.2      | 0.517          | 0.493          | 43.8        | 40.2 | 40.2 |
| 3DBC             | 3.35              | 5D9K             | 0.247             | 1.502       | 116.2      | 0.512          | 0.475          | 47.0        | 44.7 | 46.5 |
| 5J93             | 1.10              | 5V5K             | 0.278             | 1.502       | 48.3       | 0.571          | 0.572          | 87.1        | 87.1 | 86.7 |
| 6GFA             | 2.00              | 6EOB             | 0.393             | 1.502       | 228.3      | 0.536          | 0.500          | 44.7        | 37.5 | 38.4 |
| 5LAQ             | 2.40              | 3HQW             | 0.253             | 1.504       | 166.3      | 0.516          | 0.487          | 50.4        | 43.5 | 45.4 |
| 6GTO             | 2.97              | 4BOF             | 0.077             | 1.507       | 41.2       | 0.619          | 0.647          | 77.0        | 76.3 | 77.9 |
| 4NUX             | 2.29              | 3VBC             | 0.294             | 1.508       | 46.4       | 0.517          | 0.524          | 70.6        | 67.3 | 70.7 |
| 4JG2             | 1.30              | 5ODL             | 0.250             | 1.513       | 59.3       | 0.534          | 0.519          | 50.0        | 42.6 | 46.0 |
| 2D66             | 2.18              | 5AX8             | 0.384             | 1.515       | 400.0      | 0.505          | 0.458          | 42.7        | 33.2 | 41.7 |
| 5HRV             | 1.70              | 6G8R             | 0.176             | 1.516       | 57.7       | 0.536          | 0.516          | 53.7        | 53.2 | 53.8 |
| 5L4S             | 1.41              | 1SNY             | 0.285             | 1.518       | 186.7      | 0.565          | 0.529          | 59.0        | 58.1 | 55.6 |
| 3UBB             | 2.60              | 2NR9             | 0.376             | 1.520       | 374.0      | 0.455          | 0.412          | 37.7        | 37.4 | 37.8 |
| 3BW4             | 2.00              | 4IQL             | 0.330             | 1.521       | 186.5      | 0.514          | 0.493          | 45.0        | 43.3 | 43.5 |
| 5Y8B             | 2.40              | 5Y8A             | 0.457             | 1.521       | 90.7       | 0.534          | 0.529          | 53.9        | 36.3 | 38.4 |
| 6EQ2             | 1.80              | 3FK9             | 0.254             | 1.521       | 86.5       | 0.551          | 0.514          | 48.1        | 45.5 | 46.1 |
| 4ALQ             | 1.48              | 4OY7             | 0.218             | 1.527       | 70.0       | 0.538          | 0.542          | 63.0        | 49.6 | 60.8 |
| 4UTL             | 1.23              | 3L5A             | 0.274             | 1.529       | 83.0       | 0.529          | 0.514          | 51.2        | 42.3 | 47.0 |
| 5PHS             | 2.54              | 6DQB             | 0.393             | 1.531       | 194.8      | 0.519          | 0.523          | 59.1        | 53.8 | 56.6 |
| 5MQO             | 2.50              | 4QK0             | 0.359             | 1.532       | 408.2      | 0.495          | 0.478          | 53.5        | 41.2 | 44.0 |
| 5TDB             | 1.10              | 3NIJ             | 0.477             | 1.534       | 72.5       | 0.539          | 0.458          | 50.1        | 49.5 | 50.2 |
| 5EXN             | 1.49              | 2OLG             | 0.327             | 1.540       | 356.6      | 0.525          | 0.459          | 42.0        | 41.6 | 41.8 |
| 4RTR             | 2.39              | 1YFL             | 0.257             | 1.544       | 76.1       | 0.535          | 0.538          | 64.5        | 64.5 | 59.7 |
| 1Z2M             | 2.50              | 6MDH             | 0.505             | 1.545       | 24.0       | 0.597          | 0.593          | 82.1        | 82.4 | 82.1 |

| Target structure | Target resolution | Search structure | Sequence identity | GESAMT RMSD | PHASER LLG | Initial R-free | Refined R-free | Phase error |      |      |
|------------------|-------------------|------------------|-------------------|-------------|------------|----------------|----------------|-------------|------|------|
|                  |                   |                  |                   |             |            |                |                | CR          | JB   | SF   |
| 3JS5             | 1.94              | 1JF8             | 0.214             | 1.546       | 40.4       | 0.512          | 0.515          | 72.6        | 72.4 | 58.7 |
| 5OPPF            | 1.08              | 4OY7             | 0.299             | 1.546       | 118.6      | 0.544          | 0.483          | 46.7        | 45.9 | 46.2 |
| 3LHI             | 1.33              | 1VL1             | 0.243             | 1.547       | 74.2       | 0.543          | 0.542          | 79.5        | 75.7 | 47.2 |
| 2A0M             | 1.60              | 3M1R             | 0.231             | 1.549       | 91.1       | 0.525          | 0.505          | 54.4        | 46.2 | 45.9 |
| 3G28             | 1.64              | 4COC             | 0.208             | 1.551       | 53.7       | 0.528          | 0.533          | 65.8        | 60.8 | 60.4 |
| 5I4N             | 1.54              | 3QGY             | 0.285             | 1.552       | 156.9      | 0.538          | 0.509          | 43.3        | 40.4 | 42.7 |
| 5G28             | 1.57              | 4HYJ             | 0.197             | 1.553       | 159.6      | 0.522          | 0.479          | 55.9        | 52.4 | 51.1 |
| 6BPW             | 2.43              | 4VVZ             | 0.188             | 1.553       | 123.0      | 0.499          | 0.464          | 55.9        | 53.5 | 51.6 |
| 3ET9             | 2.80              | 5DHX             | 0.493             | 1.557       | 94.9       | 0.510          | 0.506          | 62.7        | 62.1 | 56.8 |
| 4X1G             | 2.25              | 1K4W             | 0.273             | 1.560       | 86.6       | 0.564          | 0.554          | 56.3        | 48.0 | 50.7 |
| 3A2I             | 3.27              | 1N4H             | 0.251             | 1.567       | 91.0       | 0.547          | 0.518          | 62.8        | 64.0 | 57.1 |
| 4F8X             | 1.47              | 4BS0             | 0.305             | 1.567       | 99.6       | 0.542          | 0.532          | 72.6        | 51.6 | 51.2 |
| 5N13             | 1.16              | 5J18             | 0.235             | 1.568       | 108.2      | 0.560          | 0.506          | 51.3        | 50.7 | 42.3 |
| 4YUO             | 1.20              | 2OSE             | 0.263             | 1.573       | 96.8       | 0.544          | 0.504          | 46.2        | 41.2 | 40.6 |
| 4LU3             | 2.00              | 4TWL             | 0.285             | 1.575       | 358.5      | 0.505          | 0.466          | 48.5        | 44.3 | 48.4 |
| 5AUL             | 1.10              | 1CJ1             | 0.323             | 1.575       | 83.0       | 0.545          | 0.501          | 50.0        | 49.4 | 49.2 |
| 6MGL             | 1.50              | 6P2L             | 0.383             | 1.575       | 169.5      | 0.545          | 0.545          | 81.4        | 80.5 | 52.7 |
| 4H4B             | 2.90              | 4OHF             | 0.337             | 1.576       | 209.2      | 0.519          | 0.499          | 52.9        | 46.6 | 47.7 |
| 5MAF             | 2.80              | 6GT1             | 0.286             | 1.579       | 56.3       | 0.552          | 0.534          | 85.2        | 84.9 | 85.2 |
| 5VML             | 1.70              | 3JQ6             | 0.251             | 1.579       | 153.6      | 0.566          | 0.541          | 53.4        | 51.9 | 49.4 |
| 5OY2             | 1.36              | 5FUK             | 0.344             | 1.580       | 56.9       | 0.535          | 0.533          | 77.2        | 63.0 | 63.5 |
| 5ZLJ             | 1.96              | 5K0D             | 0.276             | 1.581       | 217.3      | 0.547          | 0.534          | 57.1        | 49.7 | 49.8 |
| 3O5R             | 1.10              | 5U9A             | 0.231             | 1.583       | 115.8      | 0.546          | 0.502          | 52.9        | 51.5 | 51.7 |
| 4LHL             | 1.43              | 6HOS             | 0.302             | 1.583       | 104.6      | 0.548          | 0.542          | 64.2        | 51.8 | 52.2 |
| 5HJK             | 2.00              | 2ZZN             | 0.353             | 1.583       | 97.4       | 0.547          | 0.594          | 87.0        | 88.3 | 87.3 |
| 3P7Y             | 1.20              | 3L5A             | 0.249             | 1.587       | 46.0       | 0.552          | 0.549          | 82.9        | 82.1 | 76.7 |
| 5C7H             | 1.30              | 3V0T             | 0.283             | 1.588       | 139.6      | 0.551          | 0.519          | 47.6        | 39.6 | 42.0 |
| 6D4T             | 1.54              | 2QR6             | 0.243             | 1.588       | 151.8      | 0.507          | 0.475          | 45.7        | 43.7 | 42.3 |
| 3W8F             | 1.45              | 2B4Q             | 0.324             | 1.590       | 56.8       | 0.548          | 0.536          | 55.2        | 52.2 | 54.2 |
| 6D20             | 1.62              | 35CZ             | 0.244             | 1.591       | 90.1       | 0.555          | 0.548          | 53.1        | 47.7 | 49.0 |
| 2ZU1             | 1.50              | 5KY0             | 0.381             | 1.592       | 135.1      | 0.571          | 0.561          | 67.6        | 44.5 | 45.1 |
| 5EP7             | 1.20              | 5DKH             | 0.206             | 1.593       | 78.5       | 0.524          | 0.487          | 54.6        | 51.9 | 48.0 |
| 5TG0             | 1.44              | 3H8U             | 0.158             | 1.593       | 54.3       | 0.539          | 0.544          | 71.0        | 68.2 | 66.9 |
| 4YCO             | 1.50              | 6DBE             | 0.284             | 1.594       | 51.9       | 0.544          | 0.533          | 75.9        | 73.3 | 58.0 |
| 6BT1             | 1.48              | 3G6S             | 0.214             | 1.596       | 92.1       | 0.546          | 0.524          | 52.8        | 43.1 | 47.5 |
| 1UP0             | 1.75              | 6IDW             | 0.313             | 1.597       | 261.4      | 0.542          | 0.529          | 49.6        | 43.6 | 45.6 |
| 4GK6             | 1.65              | 4AOZ             | 0.323             | 1.599       | 53.9       | 0.534          | 0.535          | 64.3        | 62.5 | 47.2 |
| 5T9C             | 1.48              | 1O1Z             | 0.262             | 1.600       | 110.8      | 0.526          | 0.499          | 49.3        | 45.9 | 47.9 |
| 4MX6             | 1.10              | 4NQ8             | 0.233             | 1.605       | 35.3       | 0.543          | 0.543          | 88.9        | 88.9 | 85.4 |
| 5NY7             | 1.31              | 5G3O             | 0.191             | 1.609       | 129.7      | 0.555          | 0.518          | 50.5        | 44.3 | 44.5 |
| 5J1X             | 1.47              | 4KU8             | 0.478             | 1.614       | 98.7       | 0.528          | 0.502          | 55.3        | 53.8 | 51.7 |
| 6B7I             | 1.54              | 35CZ             | 0.352             | 1.616       | 102.0      | 0.522          | 0.487          | 50.2        | 43.4 | 43.2 |
| 2RBK             | 1.00              | 3R4C             | 0.385             | 1.617       | 233.3      | 0.535          | 0.457          | 38.1        | 35.4 | 36.9 |
| 4U5X             | 1.90              | 1Z0D             | 0.255             | 1.618       | 47.9       | 0.547          | 0.562          | 62.4        | 61.9 | 60.0 |
| 1H2N             | 2.84              | 6AVS             | 0.288             | 1.619       | 142.4      | 0.554          | 0.543          | 62.3        | 61.4 | 60.4 |
| 6B2P             | 3.01              | 3QGY             | 0.230             | 1.621       | 80.4       | 0.495          | 0.485          | 60.3        | 45.8 | 50.5 |
| 4OPC             | 1.40              | 3OZ2             | 0.243             | 1.625       | 158.6      | 0.537          | 0.510          | 51.4        | 47.9 | 47.1 |
| 5GZC             | 1.08              | 1ULG             | 0.171             | 1.631       | 86.9       | 0.548          | 0.500          | 45.6        | 43.4 | 45.8 |
| 5WVK             | 3.11              | 4M69             | 0.336             | 1.638       | 308.9      | 0.504          | 0.466          | 42.5        | 37.9 | 38.9 |
| 51MA             | 1.04              | 3ZVJ             | 0.239             | 1.639       | 26.8       | 0.532          | 0.537          | 83.1        | 82.3 | 65.2 |
| 4N4K             | 2.20              | 1FGJ             | 0.316             | 1.640       | 135.5      | 0.535          | 0.524          | 68.3        | 60.6 | 58.5 |
| 4WJE             | 1.29              | 356D             | 0.261             | 1.642       | 78.6       | 0.559          | 0.550          | 65.5        | 44.1 | 45.5 |
| 5ZH9             | 1.06              | 3WP6             | 0.309             | 1.644       | 107.7      | 0.543          | 0.502          | 53.0        | 50.5 | 49.9 |
| 1O8S             | 1.05              | 4PMU             | 0.361             | 1.645       | 119.5      | 0.550          | 0.531          | 53.0        | 44.5 | 40.1 |
| 6C2Q             | 2.17              | 3X43             | 0.301             | 1.645       | 251.9      | 0.516          | 0.494          | 50.8        | 47.0 | 45.8 |
| 4AY5             | 3.15              | 5GTW             | 0.285             | 1.646       | 164.0      | 0.567          | 0.557          | 62.2        | 47.8 | 53.6 |
| 51KN             | 3.00              | 6K6L             | 0.283             | 1.647       | 388.9      | 0.474          | 0.432          | 49.1        | 39.2 | 41.1 |
| 6GAE             | 1.80              | 6RF7             | 0.239             | 1.648       | 157.0      | 0.492          | 0.459          | 46.9        | 44.2 | 43.9 |
| 6AYD             | 3.00              | 5UOX             | 0.277             | 1.649       | 128.2      | 0.475          | 0.474          | 62.8        | 53.9 | 53.4 |
| 5WJD             | 2.00              | 3EFA             | 0.210             | 1.650       | 27.1       | 0.593          | 0.573          | 83.4        | 83.2 | 81.0 |
| 4ZAS             | 1.06              | 41WS             | 0.397             | 1.651       | 221.5      | 0.540          | 0.518          | 49.6        | 39.9 | 38.2 |
| 3NV5             | 1.02              | 3SLH             | 0.302             | 1.653       | 97.7       | 0.524          | 0.509          | 54.5        | 48.4 | 47.9 |
| 4DE7             | 2.99              | 2B08             | 0.234             | 1.653       | 74.6       | 0.532          | 0.509          | 63.4        | 56.3 | 58.9 |
| 5ETB             | 1.29              | 6MR4             | 0.208             | 1.657       | 67.9       | 0.525          | 0.473          | 48.9        | 46.4 | 47.9 |
| 4YU1             | 1.02              | 3V0T             | 0.248             | 1.660       | 66.0       | 0.542          | 0.537          | 80.3        | 57.0 | 77.3 |
| 5VDC             | 1.60              | 5U2J             | 0.519             | 1.660       | 56.4       | 0.560          | 0.536          | 51.8        | 49.9 | 50.6 |
| 2YD6             | 1.35              | 3PXJ             | 0.511             | 1.662       | 95.4       | 0.554          | 0.525          | 51.8        | 48.3 | 40.3 |
| 4PMS             | 2.80              | 4FC0             | 0.304             | 1.663       | 90.2       | 0.512          | 0.500          | 58.4        | 51.1 | 51.5 |
| 4UYT             | 1.03              | 5FV6             | 0.331             | 1.663       | 79.6       | 0.537          | 0.530          | 47.2        | 37.3 | 39.2 |
| 4WJM             | 1.70              | 1VM7             | 0.233             | 1.666       | 90.2       | 0.552          | 0.541          | 76.4        | 66.0 | 50.5 |
| 355Q             | 1.85              | 3U1X             | 0.253             | 1.671       | 64.1       | 0.505          | 0.508          | 77.7        | 76.6 | 75.4 |
| 4GVZ             | 2.96              | 6PH2             | 0.273             | 1.672       | 73.2       | 0.479          | 0.488          | 70.5        | 66.9 | 70.2 |
| 51KD             | 1.11              | 5C2I             | 0.280             | 1.674       | 223.6      | 0.523          | 0.476          | 47.5        | 45.4 | 40.6 |
| 4OY3             | 1.20              | 3BSF             | 0.243             | 1.675       | 51.0       | 0.536          | 0.521          | 50.9        | 43.4 | 46.1 |
| 2PQC             | 1.60              | 1X8R             | 0.282             | 1.680       | 88.6       | 0.509          | 0.508          | 79.4        | 79.5 | 67.5 |
| 6AUB             | 1.65              | 3P86             | 0.302             | 1.680       | 97.0       | 0.548          | 0.545          | 74.0        | 53.2 | 45.9 |
| 2GG2             | 1.00              | 2V6C             | 0.222             | 1.684       | 41.5       | 0.556          | 0.550          | 84.3        | 82.9 | 71.9 |
| 2IVJ             | 1.46              | 6JYV             | 0.309             | 1.684       | 74.8       | 0.562          | 0.556          | 62.4        | 54.1 | 53.6 |
| 3ORU             | 1.11              | 3D14             | 0.282             | 1.684       | 61.4       | 0.543          | 0.531          | 83.3        | 83.2 | 69.1 |
| 4YPZ             | 1.71              | 3QUV             | 0.426             | 1.684       | 67.8       | 0.560          | 0.542          | 58.9        | 37.7 | 38.1 |
| 4LUU             | 1.95              | 4OKZ             | 0.221             | 1.686       | 46.0       | 0.534          | 0.532          | 81.3        | 81.9 | 82.2 |
| 4PWP             | 1.80              | 4GXZ             | 0.215             | 1.686       | 39.7       | 0.548          | 0.535          | 75.8        | 75.5 | 76.0 |
| 4ROE             | 3.00              | 4NZ0             | 0.317             | 1.686       | 255.7      | 0.507          | 0.481          | 53.4        | 38.9 | 47.9 |
| 4HIK             | 1.64              | 4OWX             | 0.193             | 1.695       | 29.1       | 0.555          | 0.576          | 83.6        | 84.1 | 83.0 |
| 5IH1             | 1.31              | 51GT             | 0.377             | 1.695       | 95.9       | 0.535          | 0.523          | 71.1        | 38.8 | 39.5 |
| 1X3M             | 2.20              | 4H0O             | 0.307             | 1.704       | 213.5      | 0.492          | 0.460          | 44.8        | 38.3 | 43.6 |
| 6H5G             | 1.04              | 5SWU             | 0.241             | 1.705       | 74.0       | 0.566          | 0.525          | 50.8        | 47.3 | 45.2 |
| 2OVJ             | 1.49              | 2XS6             | 0.272             | 1.707       | 101.4      | 0.543          | 0.522          | 60.8        | 59.4 | 57.0 |
| 4PAK             | 1.20              | 4O94             | 0.307             | 1.707       | 101.1      | 0.537          | 0.535          | 86.5        | 86.4 | 42.6 |

| Target structure | Target resolution | Search structure | Sequence identity | GESAMT RMSD | PHASER LLG | Initial R-free | Refined R-free | Phase error |      |      |
|------------------|-------------------|------------------|-------------------|-------------|------------|----------------|----------------|-------------|------|------|
|                  |                   |                  |                   |             |            |                |                | CR          | JB   | SF   |
| 5FM2             | 3.30              | 1OL6             | 0.223             | 1.707       | 67.8       | 0.521          | 0.527          | 58.3        | 52.1 | 54.0 |
| 6BR5             | 2.04              | 4GEZ             | 0.233             | 1.708       | 182.2      | 0.561          | 0.543          | 57.3        | 54.6 | 53.7 |
| 6C93             | 2.67              | 2Q9F             | 0.258             | 1.709       | 167.9      | 0.506          | 0.500          | 58.9        | 45.2 | 50.4 |
| 3Q26             | 2.00              | 4B5V             | 0.290             | 1.710       | 157.1      | 0.514          | 0.502          | 68.2        | 47.2 | 48.3 |
| 5VD6             | 1.20              | 4PV6             | 0.175             | 1.710       | 40.3       | 0.565          | 0.566          | 88.2        | 88.0 | 75.8 |
| 5N2X             | 1.21              | 6F8B             | 0.328             | 1.711       | 55.6       | 0.545          | 0.541          | 88.5        | 88.2 | 88.3 |
| 4UQX             | 1.20              | 1ZBP             | 0.228             | 1.712       | 56.9       | 0.535          | 0.533          | 89.0        | 88.6 | 75.8 |
| 3CHO             | 1.50              | 3NO3             | 0.242             | 1.713       | 64.6       | 0.554          | 0.558          | 75.1        | 69.4 | 55.3 |
| 6B00             | 1.20              | 4K6X             | 0.263             | 1.713       | 69.1       | 0.552          | 0.540          | 54.7        | 51.6 | 49.7 |
| 1EX9             | 2.54              | 5H6B             | 0.209             | 1.714       | 27.9       | 0.559          | 0.542          | 72.1        | 71.5 | 70.2 |
| 4OOX             | 1.03              | 3D26             | 0.384             | 1.716       | 98.7       | 0.544          | 0.537          | 54.3        | 50.7 | 43.5 |
| 5G17             | 1.20              | 4FD7             | 0.245             | 1.717       | 37.8       | 0.551          | 0.551          | 85.9        | 85.9 | 82.0 |
| 4KEF             | 1.10              | 3L50             | 0.165             | 1.719       | 70.8       | 0.529          | 0.508          | 54.6        | 48.1 | 53.9 |
| 4FHV             | 2.10              | 5JNB             | 0.292             | 1.720       | 97.9       | 0.550          | 0.536          | 56.4        | 48.6 | 49.6 |
| 2FI1             | 1.40              | 2YBD             | 0.219             | 1.723       | 50.1       | 0.531          | 0.537          | 62.6        | 57.2 | 58.2 |
| 3WFG             | 1.40              | 5UNJ             | 0.201             | 1.724       | 55.2       | 0.544          | 0.544          | 85.2        | 84.5 | 56.8 |
| 5FZ0             | 2.42              | 5YKN             | 0.424             | 1.725       | 551.1      | 0.517          | 0.486          | 50.0        | 41.1 | 39.5 |
| 4D7R             | 1.80              | 4D7Q             | 0.453             | 1.726       | 109.7      | 0.520          | 0.513          | 57.3        | 46.2 | 53.3 |
| 4K8W             | 1.67              | 4ME8             | 0.247             | 1.728       | 65.4       | 0.546          | 0.509          | 52.5        | 51.4 | 51.6 |
| 2DY5             | 2.71              | 4RAJ             | 0.227             | 1.729       | 72.7       | 0.513          | 0.502          | 63.9        | 43.1 | 58.5 |
| 4B62             | 1.45              | 3WPW             | 0.352             | 1.729       | 133.8      | 0.540          | 0.516          | 44.5        | 42.9 | 43.0 |
| 6HHF             | 2.90              | 5M57             | 0.236             | 1.730       | 41.6       | 0.527          | 0.519          | 77.0        | 77.3 | 78.4 |
| 5JXH             | 2.00              | 4LVN             | 0.193             | 1.733       | 85.3       | 0.539          | 0.541          | 72.0        | 69.8 | 72.0 |
| 5F7V             | 1.40              | 5YSE             | 0.220             | 1.740       | 57.2       | 0.555          | 0.555          | 83.6        | 83.5 | 78.8 |
| 5VZC             | 1.55              | 3PMN             | 0.347             | 1.740       | 108.5      | 0.541          | 0.528          | 55.6        | 52.8 | 46.0 |
| 3PPT             | 1.28              | 3EM0             | 0.222             | 1.741       | 36.7       | 0.560          | 0.562          | 75.2        | 73.8 | 73.5 |
| 4U63             | 1.67              | 1HQU             | 0.356             | 1.746       | 203.1      | 0.529          | 0.511          | 51.9        | 47.9 | 46.6 |
| 4DVC             | 1.20              | 4ZL7             | 0.281             | 1.751       | 42.7       | 0.539          | 0.530          | 60.4        | 56.6 | 44.8 |
| 6HM1             | 1.54              | 4DWS             | 0.262             | 1.754       | 50.7       | 0.539          | 0.538          | 82.9        | 82.7 | 73.6 |
| 2WOY             | 1.50              | 4OFQ             | 0.356             | 1.755       | 99.4       | 0.532          | 0.530          | 75.3        | 66.8 | 44.0 |
| 3NY4             | 1.22              | 2WUQ             | 0.209             | 1.762       | 42.0       | 0.555          | 0.547          | 77.9        | 74.5 | 61.2 |
| 4XT0             | 2.06              | 4QQ7             | 0.267             | 1.764       | 81.3       | 0.544          | 0.534          | 52.9        | 45.0 | 47.3 |
| 5XQK             | 1.12              | 3OOY             | 0.261             | 1.764       | 173.2      | 0.551          | 0.543          | 58.7        | 49.4 | 47.1 |
| 4M36             | 2.04              | 4HSG             | 0.246             | 1.765       | 49.2       | 0.544          | 0.538          | 78.3        | 77.0 | 73.1 |
| 5BQF             | 1.45              | 4WEQ             | 0.597             | 1.765       | 652.8      | 0.523          | 0.468          | 45.8        | 45.8 | 39.3 |
| 4KVK             | 1.98              | 6ERC             | 0.214             | 1.772       | 84.6       | 0.537          | 0.531          | 80.1        | 71.4 | 63.4 |
| 5M7U             | 1.00              | 2XD3             | 0.237             | 1.772       | 45.2       | 0.556          | 0.556          | 88.8        | 88.6 | 84.6 |
| 5VQK             | 3.10              | 1XV9             | 0.237             | 1.772       | 44.3       | 0.555          | 0.567          | 70.5        | 67.9 | 65.3 |
| 4HOR             | 1.86              | 6C6K             | 0.568             | 1.773       | 117.3      | 0.544          | 0.541          | 63.4        | 46.3 | 48.5 |
| 4QX2             | 2.90              | 2C9K             | 0.285             | 1.773       | 236.1      | 0.460          | 0.455          | 59.6        | 56.8 | 49.7 |
| 4D7Y             | 1.44              | 4RSU             | 0.186             | 1.774       | 37.5       | 0.495          | 0.531          | 77.8        | 76.6 | 70.1 |
| 5EW6             | 2.29              | 5XTW             | 0.437             | 1.776       | 339.8      | 0.494          | 0.459          | 48.4        | 46.8 | 43.1 |
| 3KWK             | 1.54              | 3GAG             | 0.217             | 1.777       | 50.3       | 0.547          | 0.534          | 69.2        | 66.0 | 58.2 |
| 5XCY             | 1.20              | 1UP3             | 0.301             | 1.779       | 84.0       | 0.545          | 0.523          | 60.0        | 51.9 | 51.3 |
| 1LRM             | 2.10              | 3E2T             | 0.595             | 1.781       | 214.8      | 0.533          | 0.509          | 49.5        | 42.5 | 46.9 |
| 2OZG             | 2.00              | 4MY0             | 0.276             | 1.782       | 110.7      | 0.523          | 0.515          | 65.6        | 43.9 | 51.1 |
| 6G3F             | 2.22              | 6IEM             | 0.314             | 1.785       | 244.0      | 0.557          | 0.540          | 55.5        | 48.0 | 50.6 |
| 4XPL             | 1.95              | 2AE6             | 0.164             | 1.788       | 30.0       | 0.538          | 0.542          | 72.5        | 70.0 | 59.9 |
| 5T79             | 1.86              | 4PMJ             | 0.277             | 1.790       | 75.1       | 0.549          | 0.538          | 64.4        | 61.1 | 62.9 |
| 3V4B             | 1.40              | 3TJ4             | 0.247             | 1.791       | 68.8       | 0.553          | 0.551          | 84.9        | 84.8 | 49.5 |
| 4X2F             | 1.49              | 1OCU             | 0.230             | 1.797       | 67.2       | 0.539          | 0.540          | 77.1        | 73.4 | 73.9 |
| 3NWO             | 1.90              | 4X00             | 0.172             | 1.804       | 27.2       | 0.535          | 0.523          | 84.9        | 84.6 | 80.7 |
| 5FAI             | 1.80              | 3OTB             | 0.310             | 1.805       | 180.1      | 0.559          | 0.520          | 47.1        | 42.5 | 43.4 |
| 4ZJU             | 1.20              | 4IS3             | 0.199             | 1.807       | 56.4       | 0.550          | 0.547          | 85.9        | 85.6 | 53.0 |
| 6OS6             | 1.33              | 5JXM             | 0.234             | 1.807       | 67.2       | 0.546          | 0.546          | 82.2        | 72.1 | 69.5 |
| 4C2Q             | 2.40              | 3SCL             | 0.430             | 1.808       | 251.2      | 0.541          | 0.523          | 68.3        | 33.8 | 39.2 |
| 5WRL             | 3.10              | 4IKN             | 0.271             | 1.808       | 95.4       | 0.546          | 0.501          | 49.8        | 41.1 | 45.8 |
| 6DEF             | 2.15              | 1UPA             | 0.254             | 1.808       | 257.0      | 0.550          | 0.536          | 53.5        | 43.1 | 44.7 |
| 4PVK             | 1.30              | 5L6F             | 0.263             | 1.809       | 166.4      | 0.557          | 0.543          | 49.2        | 45.8 | 45.1 |
| 4QQN             | 2.08              | 4M38             | 0.248             | 1.811       | 102.0      | 0.558          | 0.547          | 65.2        | 59.0 | 54.3 |
| 6OHK             | 1.20              | 4OXX             | 0.212             | 1.815       | 49.2       | 0.551          | 0.543          | 82.0        | 80.8 | 59.4 |
| 2QDX             | 1.55              | 1QFJ             | 0.163             | 1.817       | 51.6       | 0.530          | 0.525          | 81.4        | 79.5 | 70.5 |
| 4YSV             | 2.77              | 4ZM3             | 0.254             | 1.823       | 152.5      | 0.540          | 0.516          | 62.3        | 51.1 | 49.6 |
| 3Q07             | 2.55              | 1GGM             | 0.174             | 1.824       | 66.5       | 0.533          | 0.521          | 74.5        | 69.7 | 68.4 |
| 6QQH             | 1.38              | 4MN6             | 0.165             | 1.824       | 29.8       | 0.558          | 0.523          | 83.9        | 83.3 | 83.0 |
| 1E24             | 2.35              | 4UP9             | 0.408             | 1.832       | 336.0      | 0.548          | 0.513          | 49.6        | 45.3 | 44.9 |
| 1Z35             | 2.40              | 1YBF             | 0.163             | 1.833       | 116.3      | 0.504          | 0.498          | 57.9        | 54.8 | 61.0 |
| 3QXH             | 1.36              | 6CVU             | 0.225             | 1.835       | 34.9       | 0.565          | 0.556          | 82.1        | 81.8 | 79.7 |
| 5ULU             | 2.85              | 4ZPM             | 0.273             | 1.837       | 105.5      | 0.537          | 0.529          | 55.6        | 47.9 | 50.1 |
| 4L2H             | 1.46              | 4NA0             | 0.290             | 1.839       | 289.1      | 0.525          | 0.486          | 52.2        | 48.5 | 47.7 |
| 4YZJ             | 2.11              | 6OS5             | 0.252             | 1.839       | 51.5       | 0.526          | 0.528          | 75.5        | 72.7 | 72.0 |
| 5XJH             | 1.54              | 5G5M             | 0.153             | 1.841       | 35.9       | 0.555          | 0.557          | 83.4        | 83.4 | 83.5 |
| 3RD5             | 1.50              | 2QQ5             | 0.219             | 1.844       | 71.4       | 0.543          | 0.539          | 73.1        | 68.7 | 62.0 |
| 5GUV             | 3.08              | 4FT2             | 0.340             | 1.844       | 150.5      | 0.506          | 0.498          | 67.0        | 63.4 | 62.0 |
| 2P7A             | 2.30              | 1NQ7             | 0.202             | 1.849       | 47.3       | 0.543          | 0.531          | 83.4        | 82.2 | 73.5 |
| 5D6L             | 3.20              | 5WIU             | 0.306             | 1.853       | 70.3       | 0.481          | 0.479          | 76.7        | 77.3 | 73.2 |
| 3CU3             | 2.00              | 2RGQ             | 0.156             | 1.855       | 41.2       | 0.544          | 0.528          | 83.4        | 83.5 | 74.3 |
| 4M9H             | 2.39              | 4FO6             | 0.360             | 1.859       | 72.1       | 0.534          | 0.531          | 70.8        | 56.0 | 61.5 |
| 5WC7             | 2.30              | 4CGS             | 0.204             | 1.862       | 35.9       | 0.546          | 0.541          | 79.3        | 78.4 | 66.4 |
| 6G28             | 1.23              | 1T5J             | 0.233             | 1.869       | 48.6       | 0.568          | 0.568          | 85.9        | 85.9 | 79.2 |
| 5IAI             | 1.60              | 4RYA             | 0.280             | 1.874       | 85.7       | 0.543          | 0.538          | 83.2        | 81.4 | 64.1 |
| 5N3G             | 1.16              | 4QMN             | 0.266             | 1.875       | 65.1       | 0.550          | 0.545          | 76.7        | 63.4 | 75.5 |
| 4TNM             | 2.90              | 5XJG             | 0.199             | 1.879       | 69.2       | 0.479          | 0.478          | 69.8        | 67.4 | 64.4 |
| 3MFI             | 1.76              | 3H4B             | 0.229             | 1.888       | 136.3      | 0.550          | 0.538          | 70.4        | 62.8 | 63.4 |
| 4DIA             | 2.00              | 4MUP             | 0.294             | 1.888       | 30.5       | 0.547          | 0.537          | 85.8        | 85.8 | 83.8 |
| 6N6X             | 3.00              | 4ZTK             | 0.172             | 1.892       | 133.6      | 0.560          | 0.509          | 57.0        | 55.0 | 55.0 |
| 1YLH             | 1.70              | 2PC9             | 0.466             | 1.893       | 155.6      | 0.531          | 0.515          | 52.5        | 42.1 | 47.1 |
| 5YBJ             | 2.34              | 1NFI             | 0.259             | 1.893       | 55.3       | 0.538          | 0.551          | 89.5        | 89.5 | 90.7 |
| 1OIZ             | 1.60              | 2OTD             | 0.260             | 1.894       | 102.3      | 0.548          | 0.557          | 68.9        | 64.4 | 54.3 |

| Target structure | Target resolution | Search structure | Sequence identity | GESAMT RMSD | PHASER LLG | Initial R-free | Refined R-free | Phase error |      |      |
|------------------|-------------------|------------------|-------------------|-------------|------------|----------------|----------------|-------------|------|------|
|                  |                   |                  |                   |             |            |                |                | CR          | JB   | SF   |
| 1JHD             | 1.70              | 1R6X             | 0.301             | 1.900       | 70.9       | 0.549          | 0.554          | 77.6        | 75.2 | 60.6 |
| 2A0N             | 1.64              | 4WDO             | 0.204             | 1.901       | 55.5       | 0.570          | 0.569          | 87.2        | 87.5 | 79.1 |
| 6DR1             | 2.49              | 4GFU             | 0.220             | 1.901       | 54.3       | 0.517          | 0.506          | 78.2        | 74.8 | 71.9 |
| 4M8U             | 1.45              | 3Z09             | 0.339             | 1.906       | 66.8       | 0.534          | 0.529          | 82.3        | 82.0 | 63.7 |
| 5IGH             | 1.55              | 5UXC             | 0.411             | 1.908       | 66.9       | 0.551          | 0.541          | 77.4        | 61.6 | 44.1 |
| 3O0F             | 1.94              | 2YB4             | 0.259             | 1.911       | 64.7       | 0.529          | 0.529          | 78.0        | 71.2 | 51.5 |
| 5HCT             | 1.36              | 3WB4             | 0.265             | 1.914       | 99.8       | 0.542          | 0.516          | 57.0        | 53.6 | 56.9 |
| 2YZA             | 3.02              | 2H34             | 0.203             | 1.915       | 44.2       | 0.537          | 0.557          | 71.8        | 72.1 | 68.6 |
| 4Q8W             | 1.14              | 6FV5             | 0.239             | 1.917       | 59.5       | 0.536          | 0.528          | 87.2        | 87.2 | 47.9 |
| 4FM1             | 3.00              | 5MDN             | 0.341             | 1.923       | 178.7      | 0.514          | 0.519          | 66.2        | 62.9 | 63.4 |
| 5P64             | 1.07              | 3WB4             | 0.265             | 1.928       | 97.3       | 0.542          | 0.518          | 56.4        | 51.2 | 55.7 |
| 12WL             | 2.80              | 5VEG             | 0.182             | 1.935       | 28.0       | 0.585          | 0.569          | 77.8        | 77.5 | 73.6 |
| 6NX0             | 1.54              | 6E1C             | 0.302             | 1.936       | 78.2       | 0.544          | 0.536          | 73.7        | 71.7 | 61.0 |
| 3MGW             | 1.75              | 6G1H             | 0.175             | 1.938       | 27.2       | 0.523          | 0.505          | 82.5        | 81.8 | 77.6 |
| 4RCZ             | 1.39              | 5IZM             | 0.243             | 1.943       | 47.0       | 0.553          | 0.538          | 80.2        | 79.2 | 64.6 |
| 5ZTH             | 3.22              | 3BT7             | 0.218             | 1.947       | 53.1       | 0.551          | 0.533          | 71.2        | 70.6 | 67.4 |
| 4JG5             | 2.34              | 3LIU             | 0.237             | 1.948       | 102.9      | 0.540          | 0.521          | 64.0        | 61.4 | 60.8 |
| 5EMU             | 1.50              | 3F4W             | 0.165             | 1.949       | 40.0       | 0.548          | 0.527          | 85.0        | 85.1 | 85.2 |
| 5EPG             | 3.39              | 1DGJ             | 0.277             | 1.950       | 84.0       | 0.530          | 0.519          | 72.0        | 65.7 | 63.8 |
| 3TEP             | 2.03              | 3OKZ             | 0.245             | 1.954       | 43.8       | 0.567          | 0.547          | 80.1        | 80.1 | 70.5 |
| 6Q4U             | 2.01              | 1D9F             | 0.412             | 1.955       | 127.1      | 0.520          | 0.524          | 71.1        | 64.0 | 71.2 |
| 6IQB             | 1.75              | 1VJG             | 0.167             | 1.956       | 43.5       | 0.557          | 0.568          | 76.1        | 63.0 | 75.4 |
| 5F3Y             | 3.41              | 3PVL             | 0.508             | 1.958       | 283.2      | 0.514          | 0.473          | 49.4        | 38.9 | 40.5 |
| 4AAN             | 1.22              | 6E1C             | 0.291             | 1.959       | 88.7       | 0.527          | 0.518          | 61.7        | 44.9 | 51.2 |
| 5H9K             | 1.35              | 3EBK             | 0.151             | 1.959       | 37.7       | 0.529          | 0.531          | 68.2        | 64.7 | 69.8 |
| 6EFY             | 2.90              | 6EG1             | 0.474             | 1.965       | 375.1      | 0.497          | 0.433          | 45.5        | 41.5 | 43.0 |
| 3UJ9             | 1.24              | 2O57             | 0.223             | 1.968       | 44.0       | 0.533          | 0.529          | 83.8        | 83.6 | 80.4 |
| 6E13             | 2.35              | 3P2U             | 0.232             | 1.971       | 66.3       | 0.545          | 0.528          | 69.3        | 68.4 | 64.7 |
| 6HOX             | 1.95              | 3RMY             | 0.239             | 1.982       | 83.9       | 0.526          | 0.533          | 66.5        | 55.4 | 53.7 |
| 6MTU             | 3.20              | 4EY1             | 0.303             | 1.984       | 63.9       | 0.567          | 0.549          | 67.9        | 64.3 | 59.7 |
| 5TGK             | 1.91              | 1J10             | 0.263             | 1.986       | 35.4       | 0.515          | 0.513          | 83.3        | 83.1 | 76.4 |
| 4AFE             | 2.59              | 3TUB             | 0.226             | 1.993       | 67.7       | 0.518          | 0.522          | 74.7        | 71.9 | 68.3 |
| 4QKL             | 1.71              | 5JNB             | 0.136             | 1.998       | 15.2       | 0.490          | 0.496          | 83.6        | 84.6 | 82.7 |
| 5T8B             | 1.50              | 5ZQ3             | 0.253             | 1.998       | 43.9       | 0.563          | 0.565          | 81.7        | 82.2 | 72.5 |
| 4XKN             | 1.85              | 4QEV             | 0.215             | 2.002       | 56.1       | 0.567          | 0.564          | 84.8        | 83.9 | 73.7 |
| 5CXW             | 1.75              | 4QVD             | 0.181             | 2.003       | 83.5       | 0.565          | 0.555          | 77.9        | 76.2 | 69.5 |
| 5E85             | 2.57              | 1DKZ             | 0.467             | 2.006       | 132.2      | 0.503          | 0.504          | 61.4        | 61.4 | 59.8 |
| 3WC3             | 1.50              | 4CJ0             | 0.221             | 2.010       | 54.4       | 0.514          | 0.513          | 83.4        | 82.8 | 71.9 |
| 3CJM             | 1.50              | 2WUQ             | 0.184             | 2.025       | 53.3       | 0.566          | 0.559          | 64.8        | 57.8 | 56.2 |
| 5JJB             | 2.31              | 4EZE             | 0.279             | 2.025       | 39.6       | 0.545          | 0.541          | 77.1        | 75.8 | 70.6 |
| 6DS0             | 3.19              | 4EA3             | 0.276             | 2.029       | 96.2       | 0.549          | 0.534          | 64.0        | 53.5 | 58.4 |
| 2XE1             | 2.50              | 6EHE             | 0.172             | 2.030       | 134.0      | 0.564          | 0.564          | 84.3        | 84.3 | 83.9 |
| 5PER             | 2.00              | 6BYA             | 0.194             | 2.034       | 39.5       | 0.571          | 0.534          | 62.5        | 61.2 | 60.6 |
| 2FY6             | 1.85              | 1Z5Y             | 0.184             | 2.037       | 24.5       | 0.544          | 0.544          | 81.7        | 81.7 | 80.9 |
| 4MSJ             | 3.29              | 4C7R             | 0.261             | 2.038       | 126.1      | 0.472          | 0.464          | 65.5        | 57.9 | 45.5 |
| 4WPL             | 1.15              | 4LZB             | 0.198             | 2.041       | 28.5       | 0.548          | 0.548          | 87.5        | 87.3 | 80.9 |
| 5B43             | 2.80              | 5MGA             | 0.390             | 2.041       | 228.5      | 0.558          | 0.548          | 68.1        | 63.0 | 61.8 |
| 4BRU             | 3.25              | 6BAJ             | 0.338             | 2.046       | 88.3       | 0.528          | 0.506          | 56.3        | 51.9 | 56.3 |
| 5IXP             | 1.73              | 6Q5G             | 0.169             | 2.047       | 50.8       | 0.534          | 0.534          | 80.0        | 79.4 | 76.4 |
| 5BPW             | 3.40              | 5BPT             | 0.630             | 2.048       | 278.5      | 0.516          | 0.500          | 57.9        | 55.0 | 43.5 |
| 6APE             | 1.45              | 1EE9             | 0.230             | 2.049       | 35.2       | 0.553          | 0.552          | 84.2        | 84.0 | 50.5 |
| 3MTT             | 3.30              | 3AJW             | 0.122             | 2.056       | 120.0      | 0.505          | 0.502          | 85.3        | 85.5 | 85.3 |
| 4X9Y             | 1.07              | 1E3Z             | 0.189             | 2.061       | 36.7       | 0.549          | 0.548          | 86.2        | 86.0 | 85.2 |
| 3B2S             | 1.92              | 4G2M             | 0.196             | 2.066       | 36.8       | 0.577          | 0.577          | 81.7        | 80.0 | 68.8 |
| 4W1S             | 2.30              | 1UKC             | 0.257             | 2.066       | 44.2       | 0.475          | 0.489          | 73.0        | 69.2 | 61.5 |
| 5OQ3             | 1.35              | 3FND             | 0.119             | 2.066       | 29.0       | 0.545          | 0.545          | 87.4        | 86.3 | 86.1 |
| 6BY9             | 2.30              | 5D66             | 0.243             | 2.068       | 61.8       | 0.539          | 0.524          | 73.8        | 70.4 | 71.2 |
| 5Z5D             | 1.70              | 3ZXX             | 0.245             | 2.088       | 45.3       | 0.540          | 0.540          | 85.7        | 82.9 | 74.4 |
| 6DYS             | 2.30              | 2QEC             | 0.132             | 2.098       | 28.0       | 0.525          | 0.522          | 81.3        | 81.2 | 81.2 |
| 4B65             | 2.32              | 5OSP             | 0.253             | 2.112       | 44.9       | 0.546          | 0.545          | 76.7        | 72.7 | 67.7 |
| 4EC3             | 2.65              | 6F72             | 0.188             | 2.121       | 32.5       | 0.522          | 0.531          | 78.0        | 77.8 | 74.5 |
| 5T39             | 1.10              | 1Y8C             | 0.125             | 2.124       | 21.8       | 0.556          | 0.555          | 87.5        | 87.2 | 87.9 |
| 6M8Y             | 1.10              | 4I0W             | 0.170             | 2.130       | 43.4       | 0.540          | 0.530          | 68.7        | 63.0 | 68.1 |
| 5XBX             | 1.04              | 3X2M             | 0.288             | 2.134       | 82.2       | 0.557          | 0.512          | 50.4        | 50.4 | 49.3 |
| 6AJK             | 3.00              | 1QAM             | 0.204             | 2.137       | 30.5       | 0.562          | 0.578          | 80.0        | 79.5 | 77.0 |
| 6EWE             | 1.46              | 6BRN             | 0.163             | 2.138       | 27.3       | 0.534          | 0.521          | 86.1        | 86.2 | 84.1 |
| 4HTV             | 3.00              | 1XM9             | 0.155             | 2.146       | 66.1       | 0.526          | 0.518          | 73.1        | 63.2 | 59.4 |
| 5T4C             | 1.80              | 5XC2             | 0.214             | 2.148       | 76.9       | 0.549          | 0.547          | 83.3        | 83.1 | 77.8 |
| 2YN0             | 1.50              | 3HJG             | 0.208             | 2.165       | 47.6       | 0.551          | 0.547          | 76.5        | 75.9 | 70.7 |
| 4L9M             | 3.00              | 6AXF             | 0.469             | 2.171       | 73.2       | 0.510          | 0.542          | 75.5        | 71.3 | 60.6 |
| 4WES             | 2.10              | 4FIU             | 0.357             | 2.185       | 64.6       | 0.568          | 0.553          | 73.0        | 45.4 | 45.7 |
| 3MDU             | 1.40              | 2OOD             | 0.169             | 2.189       | 37.9       | 0.579          | 0.579          | 87.5        | 87.6 | 86.0 |
| 4CZK             | 2.60              | 5NBM             | 0.170             | 2.197       | 25.5       | 0.537          | 0.547          | 82.3        | 81.9 | 75.2 |
| 2BHA             | 2.40              | 5FCF             | 0.251             | 2.209       | 109.1      | 0.563          | 0.552          | 64.7        | 57.4 | 62.6 |
| 2WDF             | 2.10              | 4H2I             | 0.211             | 2.220       | 44.6       | 0.551          | 0.544          | 81.7        | 81.0 | 76.2 |
| 1O1Y             | 1.70              | 2VDJ             | 0.125             | 2.225       | 34.4       | 0.562          | 0.567          | 83.8        | 83.3 | 81.6 |
| 3L0P             | 3.00              | 1TEV             | 0.256             | 2.230       | 35.7       | 0.552          | 0.542          | 79.1        | 78.9 | 73.4 |
| 4YRS             | 2.75              | 1Z7M             | 0.198             | 2.248       | 32.8       | 0.523          | 0.528          | 79.0        | 80.2 | 78.2 |
| 5O71             | 3.28              | 6H4I             | 0.594             | 2.248       | 214.0      | 0.545          | 0.487          | 51.5        | 49.9 | 48.4 |
| 5CE6             | 1.70              | 4ZNG             | 0.151             | 2.276       | 51.8       | 0.548          | 0.537          | 72.3        | 63.6 | 56.3 |
| 6F47             | 1.35              | 6R1M             | 0.216             | 2.316       | 64.0       | 0.526          | 0.529          | 79.5        | 66.2 | 80.2 |
| 4IKX             | 2.30              | 5A2N             | 0.188             | 2.319       | 109.6      | 0.481          | 0.491          | 85.1        | 84.9 | 84.4 |
| 4DU4             | 2.28              | 4QCL             | 0.170             | 2.334       | 54.0       | 0.554          | 0.561          | 81.0        | 80.6 | 70.4 |
| 5YDM             | 2.50              | 4AMN             | 0.273             | 2.340       | 59.9       | 0.576          | 0.554          | 77.6        | 76.5 | 61.1 |
| 6Q7O             | 2.00              | 3176             | 0.168             | 2.381       | 20.7       | 0.572          | 0.578          | 85.9        | 86.4 | 87.4 |
| 5MW5             | 2.70              | 4XBM             | 0.452             | 2.543       | 54.9       | 0.506          | 0.502          | 66.2        | 64.6 | 62.4 |
| 5F4V             | 2.90              | 5B5K             | 0.545             | 2.549       | 22.0       | 0.517          | 0.491          | 70.5        | 71.2 | 67.4 |
| 5CVR             | 2.60              | 5I2D             | 0.166             | 2.563       | 38.3       | 0.515          | 0.532          | 70.0        | 67.3 | 67.2 |
| 5W17             | 2.58              | 1QJ9             | 0.061             | 2.572       | 35.7       | 0.569          | 0.554          | 83.7        | 83.7 | 84.0 |

| Target structure | Target resolution | Search structure | Sequence identity | GESAMT RMSD | PHASER LLG | Initial R-free | Refined R-free | Phase error |      |      |
|------------------|-------------------|------------------|-------------------|-------------|------------|----------------|----------------|-------------|------|------|
|                  |                   |                  |                   |             |            |                |                | CR          | JB   | SF   |
| 2XO7             | 2.85              | 5DKU             | 0.251             | 2.640       | 60.7       | 0.536          | 0.535          | 77.8        | 77.8 | 71.0 |
| 5YF8             | 3.40              | 3NAH             | 0.119             | 2.661       | 40.9       | 0.564          | 0.569          | 80.7        | 79.5 | 77.3 |
| 3K5Y             | 2.30              | 5YKI             | 0.240             | 2.693       | 36.2       | 0.545          | 0.547          | 70.8        | 70.2 | 64.8 |
| 2XZP             | 2.72              | 2XZL             | 0.526             | 2.737       | 131.0      | 0.530          | 0.525          | 59.8        | 54.5 | 59.6 |
| 4IFQ             | 3.25              | 4KNH             | 0.186             | 2.773       | 73.5       | 0.559          | 0.558          | 73.2        | 65.8 | 58.6 |
| 5ER3             | 2.10              | 3C6Q             | 0.139             | 2.805       | 49.7       | 0.538          | 0.532          | 69.9        | 66.1 | 61.0 |
| 3LGC             | 2.77              | 1V98             | 0.093             | 2.821       | 22.8       | 0.546          | 0.577          | 79.9        | 80.8 | 80.7 |

Table S1: PDB structures and search models used in testing. Resolution is the resolution of the observed data as deposited at the PDB. GESAMT sequence identity is a proportional similarity between the sequences. GESAMT RMSD is a measure of conformational similarity between conserved residues. The PHASER LLG is a standard measure of the correctness of a molecular replacement solution. R factors are for the PHASER-positioned and edited model before and after preliminary refinement in Refmac5. Mean phase errors are given for models refined by conventional refinement (CR), jelly body (JB) and shift field (SF).

|                     | R-work  | R-free  |
|---------------------|---------|---------|
| Sequence identity   | -0.6570 | -0.6367 |
| GESAMT RMSD         | 0.6813  | 0.7141  |
| Phaser LLG          | -0.8197 | -0.8259 |
| Initial R-work      | 0.6787  | 0.6844  |
| Refined phase error | 0.9092  | 0.9259  |

Table S2: Comparison of refined R-work and R-free to various structure metrics. The Spearman rank correlation coefficient is used due to non-linearity. Refined R-free is a better intrinsic predictor than refined R-work of refined phase error due to the structure-dependent bias in R-work, as expected from Lunin and Skovoroda (1995). R-free also shows higher correlation with all of the other metrics except for sequence identify, including with the pre-refinement R-work.



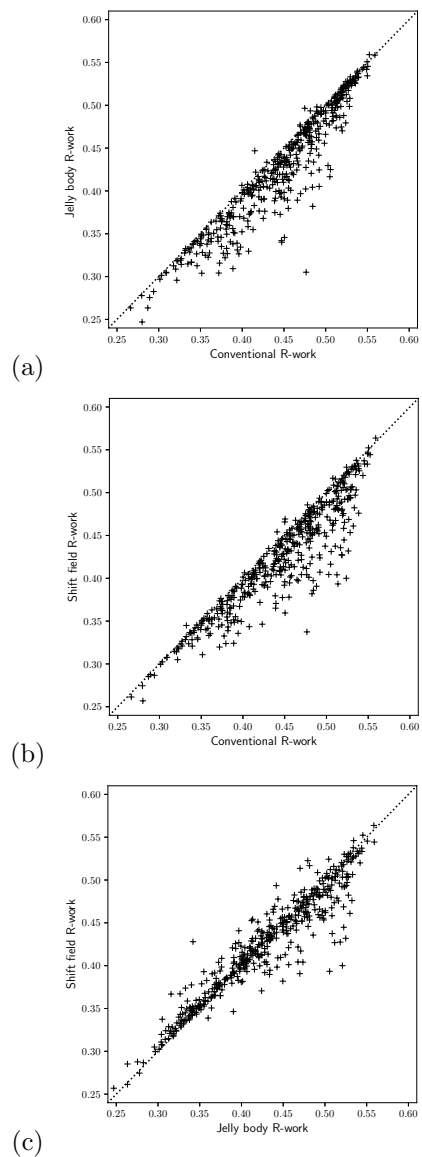

Figure S1: Comparison of crystallographic (work) R factor after the different refinement procedures: (a) Jelly body compared to conventional refinement alone, (b) Shift field compared to conventional refinement alone and (c) Shift field compared to Jelly body refinement. Points below the diagonal indicate a better result for the method on the y-axis.

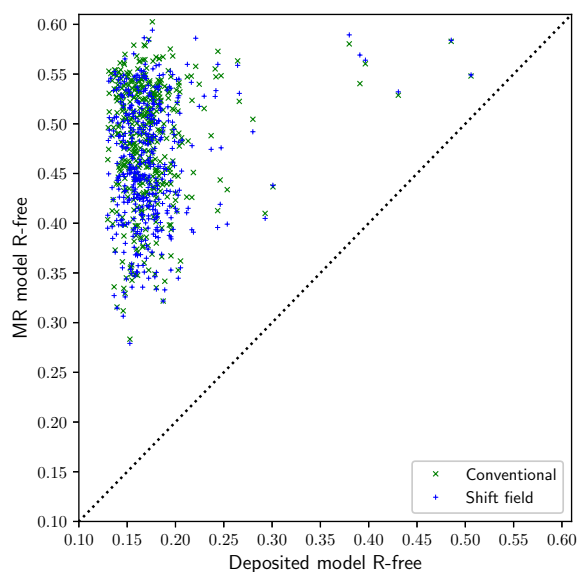

Figure S2: Comparison of free R factor after conventional or shift field refinement of the MR model to the free R factor of the conventionally refined deposited model. The MR models are substantially incomplete as a result of the homology selection criteria used in preparation of the test set.

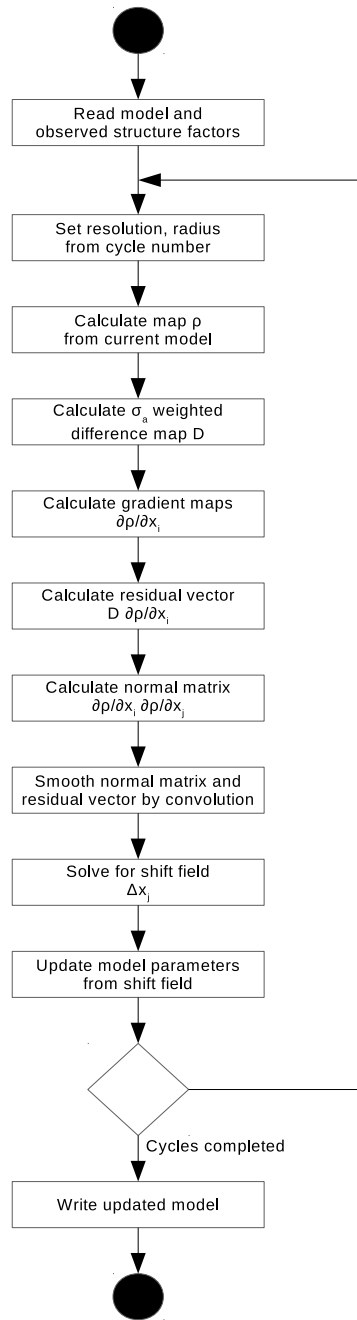

Figure S3: Process diagram for the shift field calculation (slightly simplified compared to the description in the main text.)
